# Supplementary material for: PHRF1 promotes genome integrity by modulating non-homologous end-joining
Source: PubMed Central journal article supplement (PMC4650548; doi:10.1038/cddis.2015.81), 2015-04-09
Supplement: cddis201581x1.pdf [file cddis201581x1.pdf]

## Supplementary Data

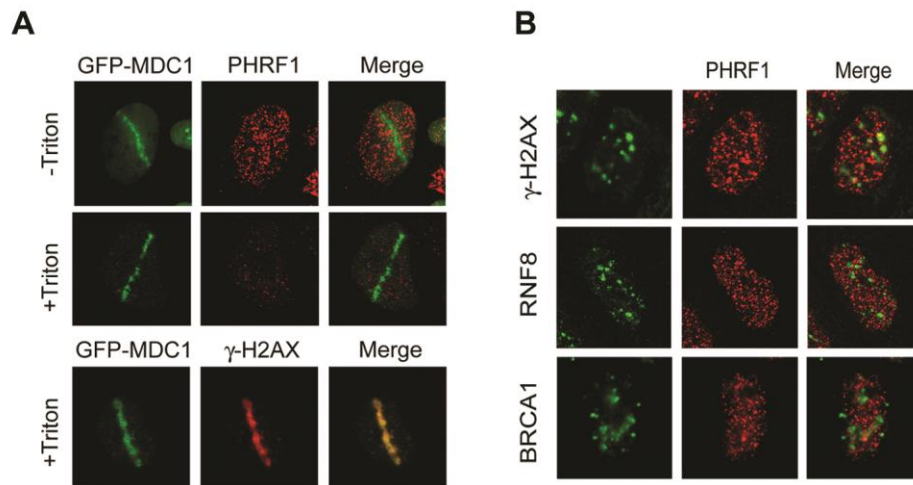

**Supplementary Figure S1.** PHRF1 did not localize to  $\gamma$ -H2AX associated nuclear foci. (A) Stably expressing GFP-MDC1 U2OS cells were microirradiated with laser light (405 nm), 0.5% Triton-extracted, and then immunostained at 2 h post laser irradiation with indicated antibodies. (B) HeLa cells were treated with CPT (10  $\mu$ M) for 3 h and fixed with 4% paraformaldehyde for immunofluorescence staining. Anti-PHRF1 antibody was simultaneously incubated with anti- $\gamma$ -H2AX, RNF8, and BRCA1 antibodies, respectively.

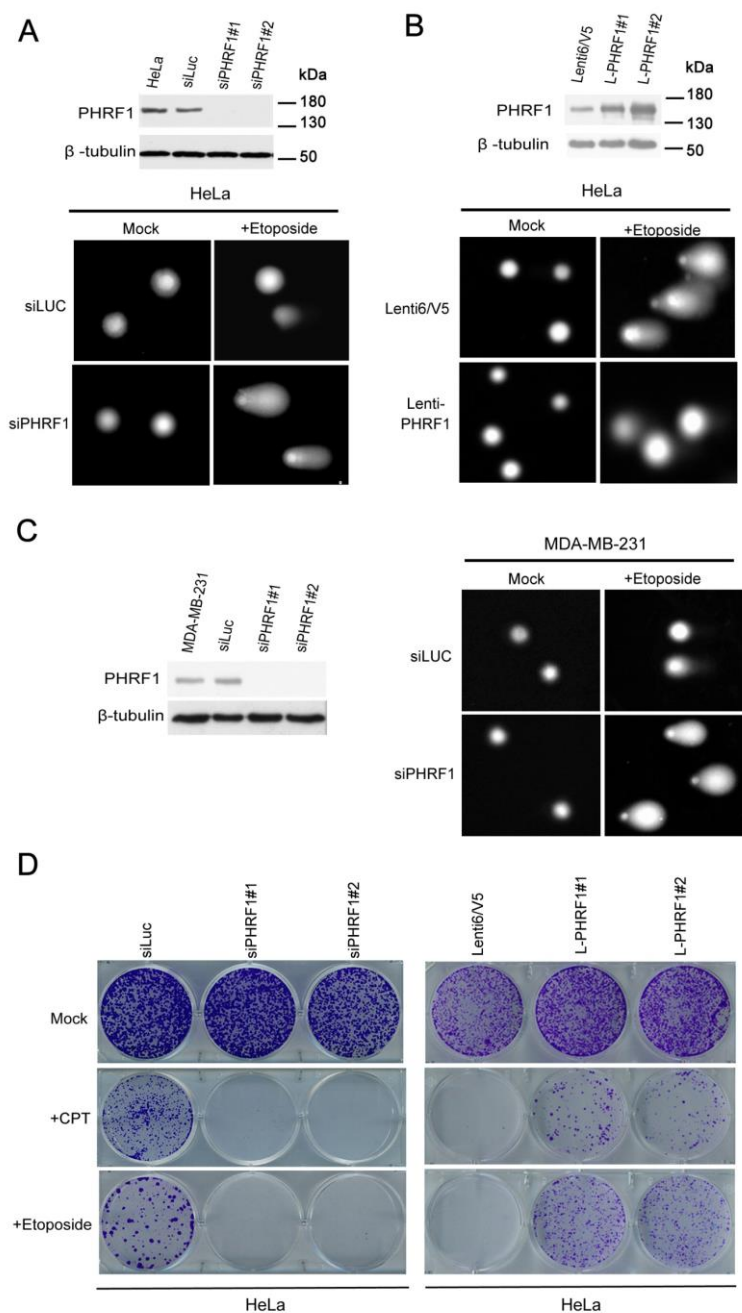

**Supplementary Figure S2.** Comet assay and clonogenic assay in HeLa cells and MDA-MB-231 cells. (A) PHRF1 depleted HeLa cells were exposed to etoposide for 30 min for the comet assay. (B) Control and PHRF1 overexpressing HeLa cells were exposed to etoposide for 1 h for the comet assay. (C) PHRF1 depleted breast cancer MDA-MB-231 cells were exposed to etoposide for 30 min for the comet assay. (D) For clonogenic assays, PHRF1-depleted HeLa cells were exposed to CPT (2  $\mu$ M) for 24 h or etoposide (10  $\mu$ M) for 1 h and PHRF1-overexpressing cells were treated with CPT (5  $\mu$ M) for 24 h or etoposide (25  $\mu$ M) for 1 h. Cells were allowed to grow for 10 days until colonies were formed.

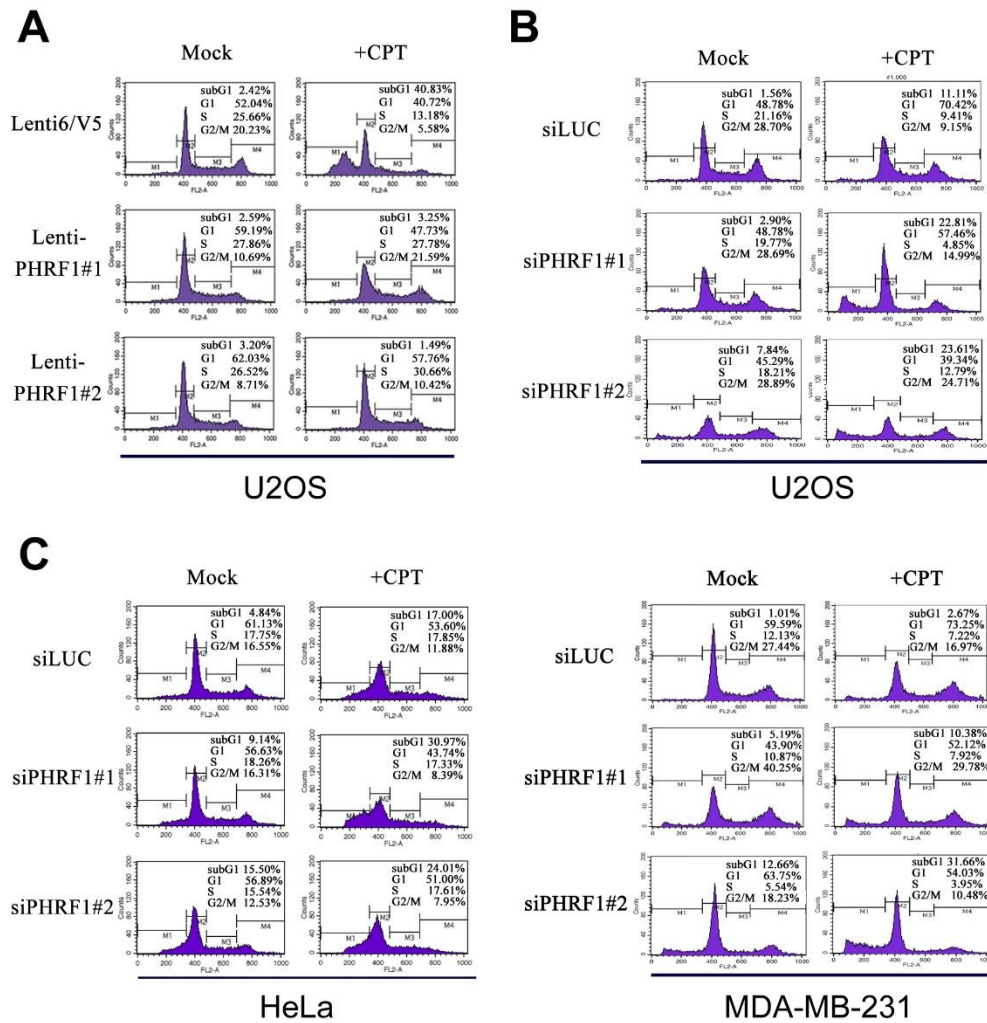

**Supplementary Figure S3.** The effects of overexpression and knockdown of PHRF1 on cell cycle. (A) DNA contents were determined by flow cytometry before and after CPT exposure (5  $\mu$ M) for 24 h in PHRF1 overexpressing U2OS cells. (B) DNA contents were determined by flow cytometry before and after CPT exposure (5  $\mu$ M) for 24 h in PHRF1 knockdown U2OS cells. (C) DNA contents were determined by flow cytometry before and after CPT exposure (5  $\mu$ M) for 24 h in PHRF1-depleted HeLa and MDA-MB-231 cells. Note that the increased sub-G1 population in PHRF1 knockdown cells but decreased in PHRF1 overexpressing cells in response to CPT treatment.

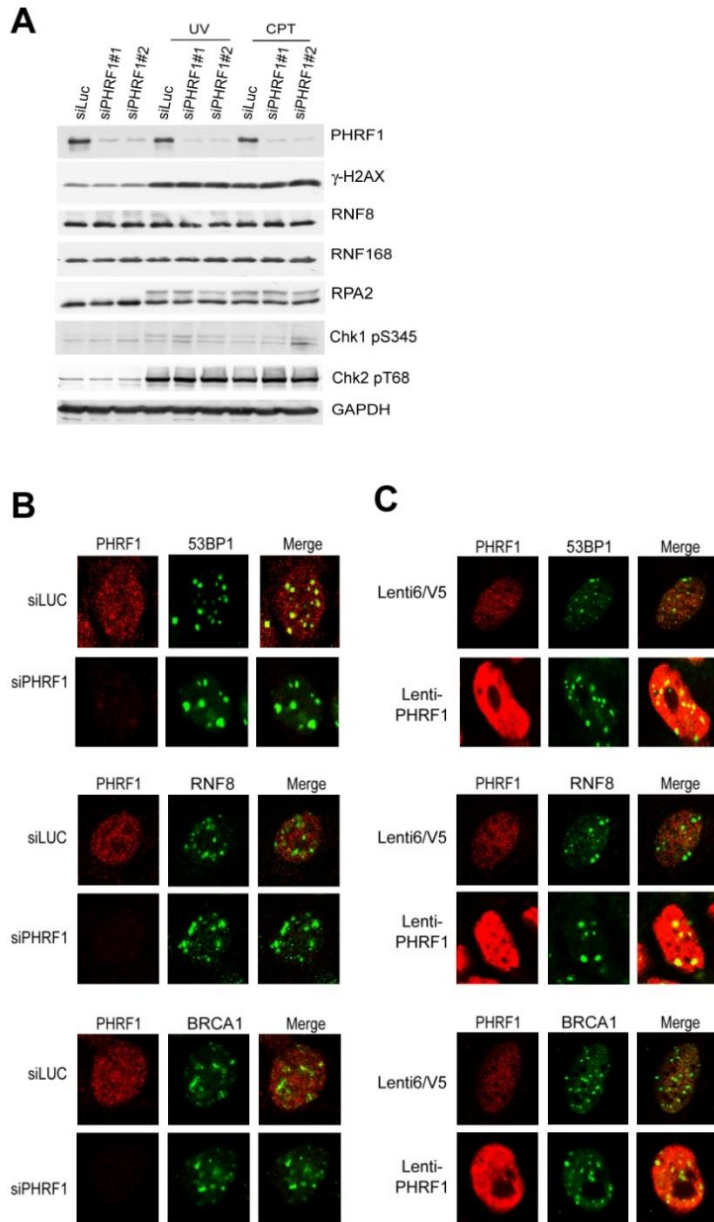

**Supplementary Figure S4.** PHRF1 did not affect DNA damage response. (A) HeLa cells were transfected with control or PHRF1 siRNAs. Seventy-two hours after siRNA transfection, cells were treated with CPT (10  $\mu$ M) for 3 h and whole cell extracts were prepared for immunoblotting analysis using indicated antibodies. (B) HeLa cells were transfected with control or PHRF1 siRNAs. Seventy-two hours after siRNA transfection, cells were treated with CPT for 3 h and then simultaneously immunostained with anti-PHRF1 and indicated antibodies. (C) Control and PHRF1 overexpressing U2OS cells were exposed to CPT (10  $\mu$ M) for 3 h and then simultaneously immunostained with anti-PHRF1 and indicated antibodies. Note that the foci formation of RNF8, 53BP1 and BRCA1 were not affected in PHRF1-depleted and overexpressing cells.

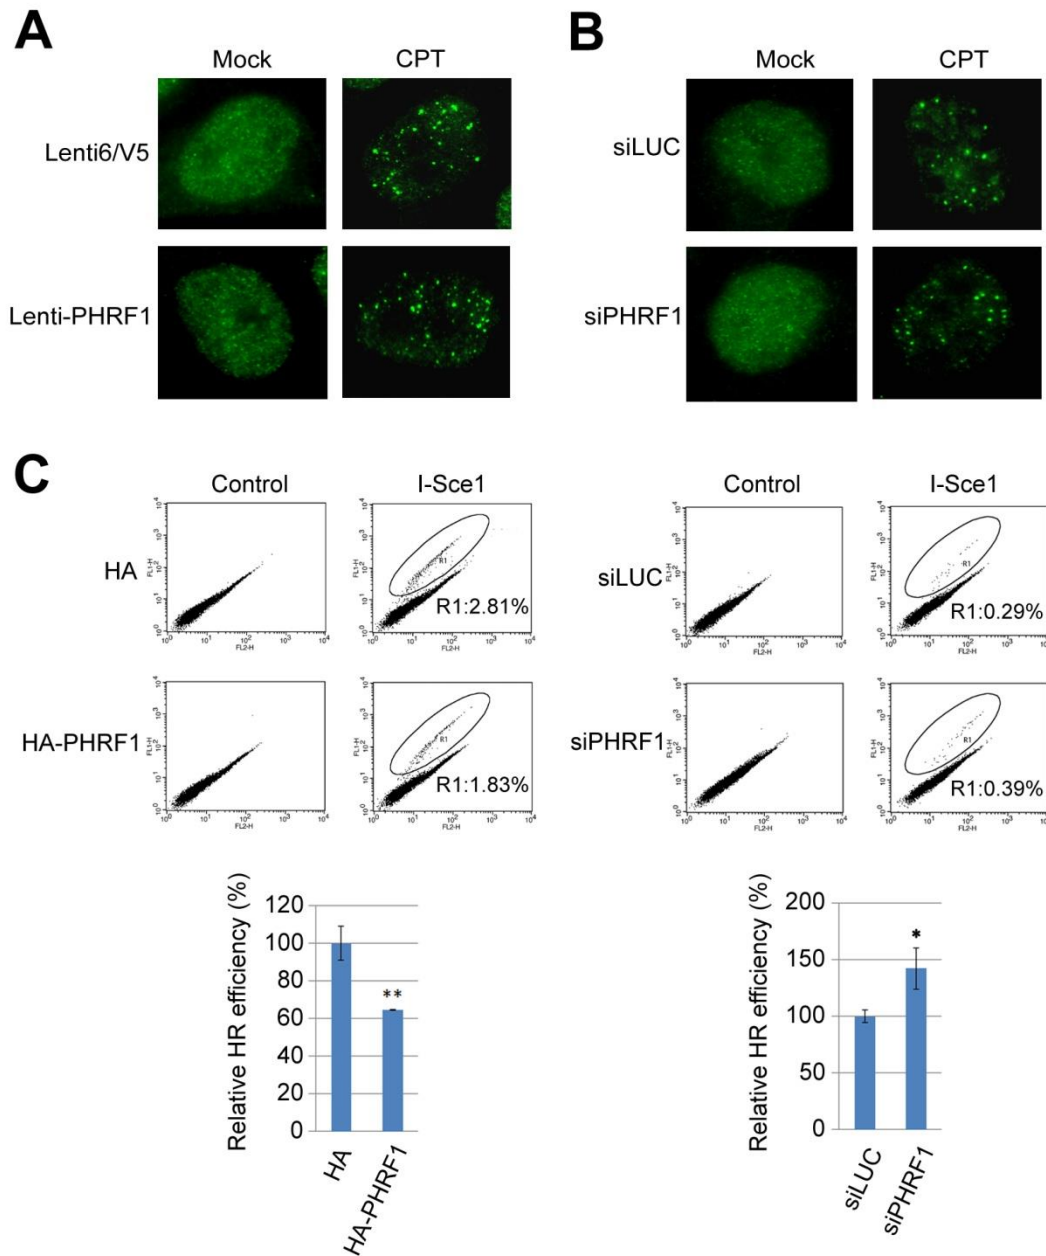

**Supplementary Figure S5.** PHRF1 was not required for Rad51 foci formation but reduced homologous recombination. (A) Control and PHRF1 overexpressing U2OS cells were exposed to CPT for 3 h. Cells were fixed in 4% paraformaldehyde and immunostained with anti-Rad51 polyclonal antibody. (B) HeLa cells were transfected with control and PHRF1 siRNAs for 72 h and then exposed to CPT for 3 h. Cells were fixed in 4% paraformaldehyde and immunostained with anti-Rad51 polyclonal antibody. (C) DR-GFP HR reporter U2OS cells were transfected with HA-PHRF1 and PHRF1 siRNAs, respectively. The expression of green fluorescence protein was measured by flow cytometry. Each experiment represented the means $\pm$ standard deviations of three independent experiments.

**A**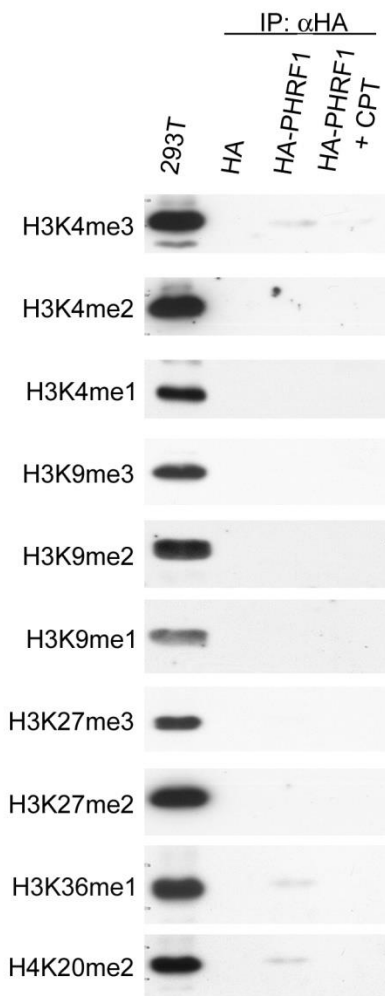**B**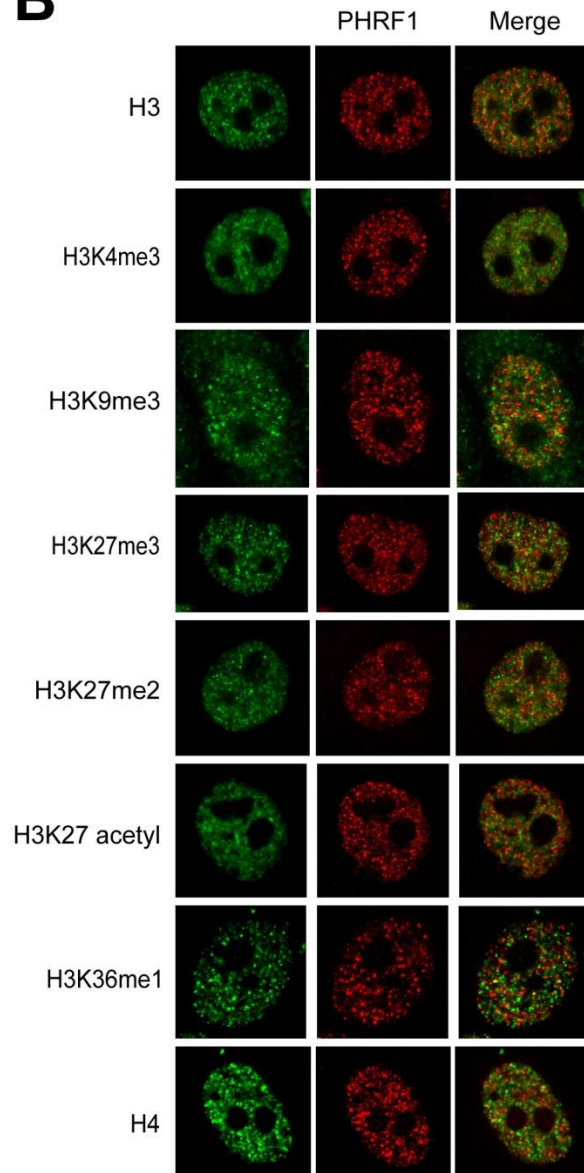

**Supplementary Figure S6.** PHRF1 did not associate with methylated H3K4, H3K9, H3K27, and H4K20 histones. (A) Empty HA vector and HA-PHRF1 were transfected into HEK293T cells and cell extracts were immunoprecipitated with anti-HA agarose. Immunoblotting analysis was conducted using indicated anti-methyl histone antibodies. (B) HeLa cells were fixed in 4% paraformaldehyde and simultaneously labeled with a mixture of anti-PHRF1 mAb (red) and indicated anti-methyl histone antibodies (green). A few amounts of H3K4me3, H3K36me1, and H4K20me2 were immunoprecipitated by HA-PARP1, but very little colocalization of these methylated histones with PHRF1.

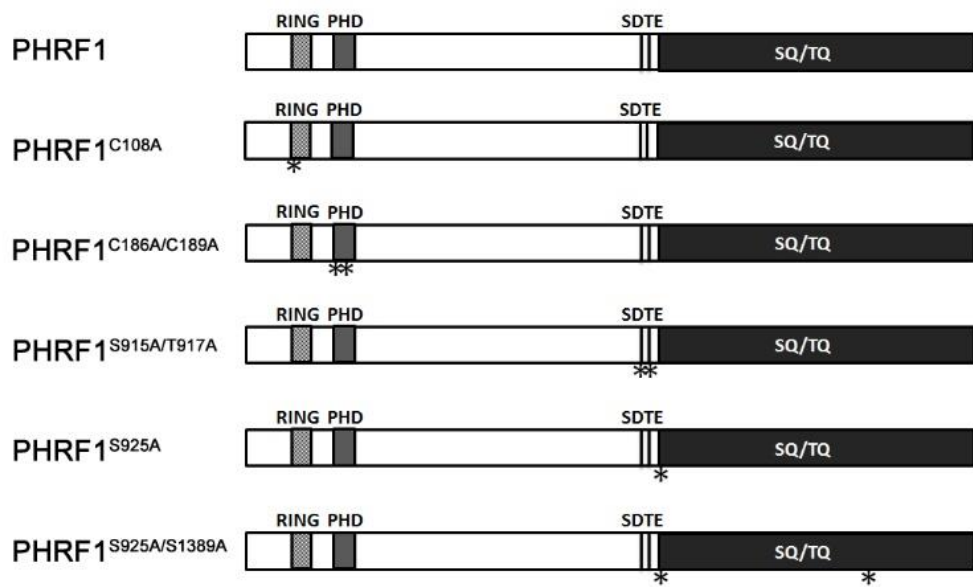

**Supplementary Figure S7.** Schematic representation of PHRF1's substitution mutants. \* indicates the position of substituted protein residues. Note that there are seven SQ/TQ motifs in PHRF1.

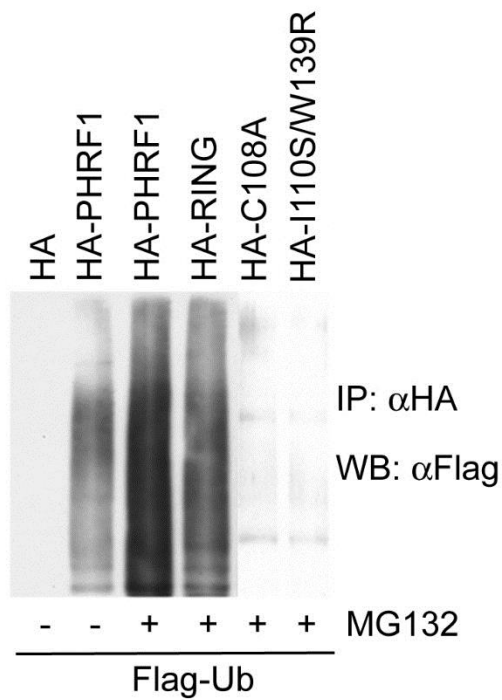

**Supplementary Figure S8.** PHRF1 is polyubiquitinated. HA vector, HA-PHRF1, HA-RING domain, and two PHRF1 E3 ligase mutants, HA-PHRF1<sup>C108A</sup> (HA-C108A) and HA-PHRF1<sup>I110S/W139R</sup> (HA-I110S/W139R) were co-transfected with Flag-Ubiquitin into HEK293 cells with or without the addition of MG132. Total cell extracts were immunoprecipitated with anti-HA agarose and immunoblotted with anti-Flag antibody.



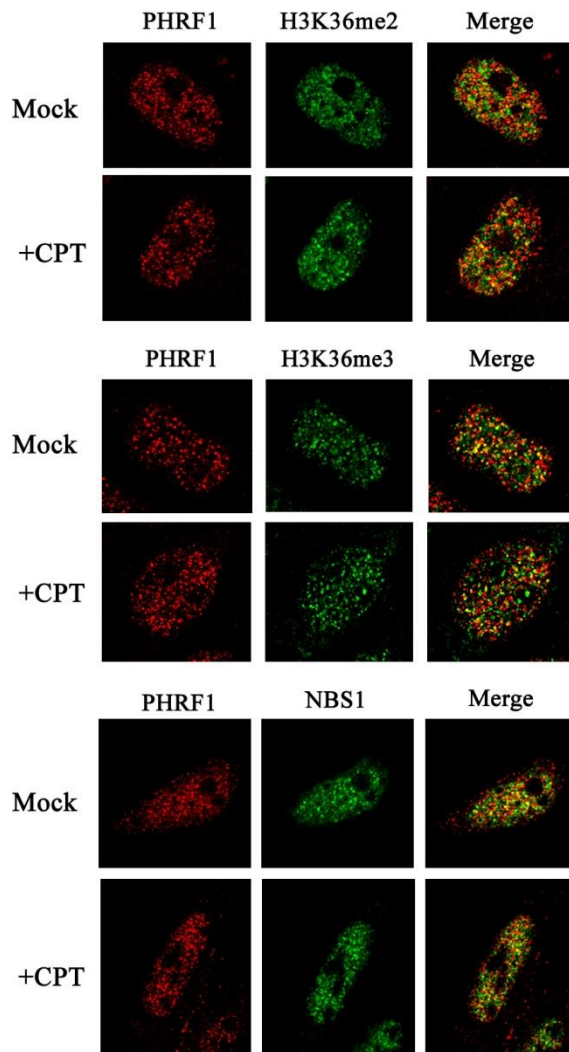

**Supplementary Figure S9.** Human SV-40-immortalized *ATM* fibroblasts from Coriell Cell Repositories were exposed to CPT and then fixed in 4% paraformaldehyde and simultaneously labeled with a mixture of anti-PHRF1 mAb (red) and indicated antibodies (green).

## **Supplementary Materials and Methods**

**Antibodies.** Mouse anti-RPA2, anti-Chk1pS345, anti-Chk2pT68, and anti- $\gamma$ -H2AX were from Cell Signaling (Danvers, MA). Rabbit anti-RNF8, anti-RNF168, and anti-MSH6 antibodies were from Abcam (Cambridge, UK). Mouse anti-GAPDH antibody was from Novus Biologicals (Littleton, CO). Mouse anti- $\alpha$ -tubulin antibody was from Sigma-Aldrich (St. Louis, MI). Rabbit anti-NBS, Mre11, Ku70, Ku80, and BRCA1 antibodies were from GeneTex (Irvine, CA).

**Homologous recombination assay.** U2OS cells with the integrated homologous recombination reporter DR-GFP was a gift from Dr. Jeremy Stark (City of Hope, USA). One day after transfection with siRNA, U2OS-DR-GFP cells were co-transfected with an I-SceI expression vector (pCBA-I-SceI). Flow cytometry was conducted to measure the expression of GFP protein.

**Laser microirradiation.** Cells were pre-sensitized with 10  $\mu$ M of 5-bromo-2.-deoxyuridine (BrdU; Sigma Aldrich) in normal medium for 24 h at 37°C. Laser micro-irradiation was carried out with a Leica SP5 X Inverted Confocal Microscope and a 405 nm laser diode. Laser settings (full output, 2 scans) were used to generate DNA damage that was restricted to the laser path in a pre-sensitization-dependent manner with minimal cellular toxicity.
